# Supplementary material for: Efficacy of abdominal acupuncture for neck pain: A randomized controlled trial
Source: PLOS journal article supplement (doi:10.1371/journal.pone.0181360), 2017-07-17
Supplement: S4 (10.1371/journal.pone.0181360.s004) [file journal.pone.0181360.s004]

**S1 Table. Primary and secondary outcome measures over time in Group A.**

|                                   | Baseline               | 2 weeks                             | 6 weeks                             | 14 weeks                            | F Value <sup>a</sup> | P Value <sup>a</sup> |
|-----------------------------------|------------------------|-------------------------------------|-------------------------------------|-------------------------------------|----------------------|----------------------|
| <b>Primary Outcome</b>            |                        |                                     |                                     |                                     |                      |                      |
| NPQ scores                        | 41.30 (38.22 to 44.39) | 29.65 (26.72 to 32.58) <sup>b</sup> | 29.41 (26.43 to 32.38) <sup>b</sup> | 29.38 (26.17 to 32.59) <sup>b</sup> | 40.95                | < 0.001              |
| <b>Secondary Outcomes</b>         |                        |                                     |                                     |                                     |                      |                      |
| Pain VAS scores                   | 6.42 (6.09 to 6.75)    | 3.84 (3.37 to 4.31) <sup>b</sup>    | 4.06 (3.53 to 4.60) <sup>b</sup>    | 4.20 (3.65 to 4.75) <sup>b</sup>    | 58.20                | < 0.001              |
| SF-36v2 Health Survey             |                        |                                     |                                     |                                     |                      |                      |
| <i>Physical functioning</i>       | 47.37 (45.87 to 48.87) | 48.89 (47.62 to 50.17) <sup>b</sup> | 49.69 (48.32 to 51.05) <sup>b</sup> | 50.09 (48.70 to 51.47) <sup>b</sup> | 12.46                | < 0.001              |
| <i>Role-physical</i>              | 42.11 (40.51 to 43.70) | 45.26 (43.66 to 46.86) <sup>b</sup> | 45.43 (43.82 to 47.04) <sup>b</sup> | 44.67 (43.00 to 46.35) <sup>b</sup> | 9.76                 | < 0.001              |
| <i>Bodily pain</i>                | 35.06 (33.78 to 36.35) | 39.23 (37.92 to 40.54) <sup>b</sup> | 40.92 (39.45 to 42.39) <sup>b</sup> | 41.23 (39.55 to 42.90) <sup>b</sup> | 30.90                | < 0.001              |
| <i>General health</i>             | 36.66 (34.81 to 38.52) | 41.10 (39.15 to 43.04) <sup>b</sup> | 40.16 (38.19 to 42.12) <sup>b</sup> | 40.77 (38.71 to 42.84) <sup>b</sup> | 18.41                | < 0.001              |
| <i>Vitality</i>                   | 43.15 (41.15 to 45.14) | 45.89 (44.00 to 47.77) <sup>b</sup> | 46.74 (44.58 to 48.89) <sup>b</sup> | 45.92 (43.69 to 48.16) <sup>b</sup> | 7.19                 | < 0.001              |
| <i>Social functioning</i>         | 42.24 (40.23 to 44.24) | 45.82 (43.97 to 47.66) <sup>b</sup> | 45.69 (43.80 to 47.57) <sup>b</sup> | 46.66 (44.94 to 48.39) <sup>b</sup> | 14.15                | < 0.001              |
| <i>Role-emotional</i>             | 41.65 (39.29 to 44.02) | 43.64 (41.81 to 45.47)              | 43.64 (41.74 to 45.54)              | 44.05 (42.06 to 46.04)              | 2.79                 | 0.046                |
| <i>Mental health</i>              | 43.90 (42.14 to 45.67) | 45.33 (43.40 to 47.26)              | 45.77 (43.83 to 47.72)              | 44.48 (42.57 to 46.39)              | 2.43                 | 0.066                |
| <i>Physical component summary</i> | 40.89 (39.55 to 42.22) | 44.39 (43.10 to 45.68) <sup>b</sup> | 45.02 (43.62 to 46.41) <sup>b</sup> | 45.35 (43.88 to 46.81) <sup>b</sup> | 31.56                | < 0.001              |
| <i>Mental component summary</i>   | 42.94 (40.90 to 44.98) | 44.91 (43.00 to 46.81)              | 44.93 (42.91 to 46.95)              | 44.52 (42.50 to 46.53)              | 2.94                 | 0.039                |

Baseline, 2, 6, and 14-week data are expressed as mean values and 95% confidence intervals.

<sup>a</sup>F values and P values are calculated using one-way repeated-measures analysis of variance model.

<sup>b</sup>Post hoc pairwise comparisons with Bonferroni correction showed statistically significant effect as compared with baseline ( $P < 0.05$ ).
